# Supplementary material for: Family-Run Pig Farms: Research and Extension Activities for Parasite Control in a Municipality in the State of Rio de Janeiro, Brazil
Source: MDPI journal article supplement (doi:10.3390/pathogens11090971), 2022-08-26
Supplement: s1 [file s1]

**Table S1.** General information about pig handling practices garnered from the questionnaire answered by 10 family-run pig farmers in Cachoeiras de Macacu, RJ.

| Information                                                 | Responses in order of frequency                                  |           |                                                             |         |                                                             |         |
|-------------------------------------------------------------|------------------------------------------------------------------|-----------|-------------------------------------------------------------|---------|-------------------------------------------------------------|---------|
|                                                             | 1st place                                                        | %         | 2nd place                                                   | %       | 3rd place                                                   | %       |
| Property type                                               | Little farm                                                      | 7 (70%)   | Backyard of the homes                                       | 3(30%)  | -                                                           | -       |
| Breed of the pig                                            | Mixed breeds                                                     | 9 (90%)   | Mixed breeds and Duroc breed                                | 1 (10%) | -                                                           | -       |
| Type of creation                                            | Confined in pig pen                                              | 8 (80%)   | Confined in pig pen and free in the backyard                | 1 (10%) | Confined in pig pen and pig on a leash                      | 1 (10%) |
| Stocking and categorization of animals by pig pen           | There is no set number                                           | 5 (50%)   | Divide pigs by age group                                    | 4 (40%) | Only one pig per pen                                        | 1 (10%) |
| Distance from the pigsty to the producer's house            | 10 to 100 meters                                                 | 4 (40%)   | More than 200 meters                                        | 2 (20%) | Residence in another location                               | 2 (20%) |
| Facilities type                                             | Collective bays with cement wall                                 | 4 (40%)   | Collective bays with cement and wood wall                   | 2 (20%) | -                                                           | -       |
|                                                             | Collective bays with cement wall, wooden or bamboo fence         | 4 (40%)   |                                                             |         |                                                             |         |
| Pen roof                                                    | Totally covered with fiber cement tile, galvanized or PVC        | 9 (90%)   | Partially covered with fiber cement tile                    | 1 (10%) | -                                                           | -       |
| Floor of the buildings                                      | Naked soil or deteriorated cement                                | 7 (70%)   | Cemented or concreted                                       | 3 (30%) | -                                                           | -       |
| Water to cool the pig                                       | No                                                               | 9 (90%)   | Yes                                                         | 1 (10%) | -                                                           | -       |
| Habit of throwing water on the body of pigs to refresh them | Yes                                                              | 10 (100%) | -                                                           | -       | -                                                           | -       |
| Supply of drinking water                                    | <i>Ad libitum</i>                                                | 7 (70%)   | Provided two or three times a day                           | 3 (30%) | -                                                           | -       |
| Type of drinking fountains                                  | Cement fountain                                                  | 4 (40%)   | Nipple type                                                 | 3 (30%) | Cement lame and plastic bowls                               | 2 (20%) |
| Food provided to pig                                        | Remains of human and agricultural food, wheat bran and/or barley | 4 (40%)   | Remains of human and agricultural food, maize or rice flour | 3 (30%) | Agricultural remainder and specific pig feed and wheat bran | 1 (10%) |
|                                                             |                                                                  |           |                                                             |         | Horse feed, wheat bran, corn flour or rice and corn         | 1 (10%) |
|                                                             |                                                                  |           |                                                             |         | Corn bran for pig                                           |         |
| Frequency of feeding the pig                                | Twice a day                                                      | 8 (80%)   | Once a day                                                  | 1 (10%) | Three times a day                                           | 1 (10%) |
| Feeder type                                                 | Cement feeder                                                    | 6 (60%)   | Floor and cement feeder                                     | 2 (20%) | Directly on the floor                                       |         |
|                                                             |                                                                  |           |                                                             |         | Directly on the floor, plastic feeder and cut tire          | 1 (10%) |
| Food storage                                                | Yes                                                              | 8 (80%)   | No                                                          | 2 (20%) | -                                                           | -       |
| Food storage location                                       | Own room with ceiling                                            | 4 (40%)   | Plastic drum                                                | 2 (20%) | Not store                                                   | 2 (20%) |
| Type of food stored                                         | Feed                                                             | 4 (40%)   | Food scraps                                                 | 2 (20%) | Not store                                                   | 2 (20%) |
| Other animals in the farms                                  | Yes                                                              | 10 (100%) | -                                                           | -       | -                                                           | -       |
| Sharing with other animal species                           | No                                                               | 7 (70%)   | Yes                                                         | 3 (30%) | -                                                           | -       |
| Observed rats on the property                               | Yes                                                              | 8 (80%)   | No                                                          | 2 (20%) | -                                                           | -       |
| Use of drug for rodent control                              | Yes                                                              | 6 (60%)   | No                                                          | 4 (40%) | -                                                           | -       |
| Presence of fly                                             | Yes                                                              | 6 (60%)   | No                                                          | 4 (40%) | -                                                           | -       |
| Use of drug for fly control                                 | No                                                               | 6 (60%)   | Yes                                                         | 4 (40%) | -                                                           | -       |
| Observed the pigs itch                                      | Yes                                                              | 5 (50%)   | No                                                          | 5 (50%) | -                                                           | -       |

|                                                                 |                                                |           |                                                                                |         |              |         |
|-----------------------------------------------------------------|------------------------------------------------|-----------|--------------------------------------------------------------------------------|---------|--------------|---------|
| Observed the pigs itch (team observation)                       | No                                             | 6 (60%)   | Yes                                                                            | 4 (40%) | -            | -       |
| Noted blood on the pig feces                                    | No                                             | 10 (100%) | -                                                                              | -       | -            | -       |
| Change in pig behavior                                          | No                                             | 3 (30%)   | Bite pigsty structure                                                          | 3 (30%) | Cough        | 2 (20%) |
| Vaccinated animals                                              | Yes                                            | 6 (60%)   | No                                                                             | 4 (40%) | -            | -       |
| Anti - parasitic medicine                                       | Yes                                            | 10 (100%) | -                                                                              | -       | -            | -       |
| Antit - ectoparasitic medicine                                  | No                                             | 9 (90%)   | Yes                                                                            | 1 (10%) | -            | -       |
| Reproduction carried out on the property                        | Yes                                            | 8 (80%)   | No                                                                             | 2 (20%) | -            | -       |
| Type of reproduction performed                                  | Hand mating                                    | 8 (80%)   | Not reproduce                                                                  | 2 (20%) | -            | -       |
| Caring for the piglets                                          | Breastfeeding after birth and/or teeth cutting | 6 (60%)   | Breastfeeding after birth, vaccination, iron supplementation and sterilization | 4 (40%) | -            | -       |
| Accumulation of excreta in the pig enclosure (team observation) | No                                             | 6 (60%)   | Yes                                                                            | 4 (40%) | -            | -       |
| Cleaning the enclosures                                         | Manually with water                            | 6 (60%)   | Remove feces dry and use water                                                 | 2 (20%) | Manually dry | 1 (10%) |
| How to wash the environment                                     | Water                                          | 9 (90%)   | Not clean the environment, uses straw bedding                                  | 1 (10%) | -            | -       |
| Sanitary break                                                  | No                                             | 10 (100%) | -                                                                              | -       | -            | -       |
| Use of the flamethrower like to fire broom                      | No                                             | 10 (100%) | -                                                                              | -       | -            | -       |
| Cleaning utensils intended only for cleaning the pig facility   | Yes                                            | 9 (90%)   | No                                                                             | 1 (10%) | -            | -       |
|                                                                 | No                                             | 8 (80%)   | Yes                                                                            | 1 (10%) | Sporadically | 1 (10%) |
| Specific clothing only for handling pigs                        | Closed boots and/or shoes and long pants       | 5 (50%)   | Boots                                                                          | 2 (20%) | Not use      | 2 (20%) |

- : there was no other response category.

**Table S2.** General information about animal hygiene practices garnered from the questionnaire answered by pig farmers and their family members in Cachoeiras de Macacu, RJ.

| Information                                         | Responses in order of frequency |            |                                |            |                                   |           |
|-----------------------------------------------------|---------------------------------|------------|--------------------------------|------------|-----------------------------------|-----------|
|                                                     | 1st place                       | %          | 2nd place                      | %          | 3rd place                         | %         |
| Performed stool examination                         | Yes                             | 26 (76.5%) | No                             | 5 (14.7%)  | Not remember                      | 2 (5.9%)  |
| Frequency of performing the stool test              | Once a year                     | 10 (29.4%) | Does not test for feces        | 8 (23.5%)  | It's been a long time             | 6 (17.6%) |
| Anti-parasite medicine                              | Yes                             | 28 (82.3%) | No                             | 6 (17.6%)  | -                                 | -         |
| Frequency of taking worm medicine                   | Once a year                     | 9 (26.5%)  | Don't take it often            | 7 (20.6%)  | Never took medicine               | 4 (11.7%) |
| Intestinal pain                                     | No                              | 17 (50%)   | Yes                            | 16 (47%)   | Seldom                            | 1 (2.9%)  |
| Frequency of belly pain                             | Seldom                          | 17 (50%)   | Sometimes                      | 7 (20.6%)  | Did not know how to answer        | 4 (11.7%) |
| Last report of diarrhea and intestinal upset        | It's been a long time           | 12 (35.3%) | Not remember                   | 10 (29.4%) | Did not know how to answer        | 6 (17.6%) |
| Frequency of diarrhea/intestinal disorder           | Did not know how to answer      | 25 (73.5%) | Not remember                   | 4 (11.7%)  | Not often                         | 3 (8.8%)  |
| Pieces of helminth or whole helminth in their fezes | No                              | 25 (73.5%) | Yes                            | 9 (26.5%)  | -                                 | -         |
| Observed blood in his stool                         | No                              | 33 (97.1%) | Yes                            | 1 (2.9%)   | -                                 | -         |
| Residence water supply                              | Public piped water              | 18 (52.9%) | Spring water                   | 13 (38.2%) | Artesian well                     | 3 (8.8%)  |
| Water treatment                                     | Untreated                       | 29 (85.3%) | Filtered                       | 4 (11.7%)  | Buy water                         | 1 (2.9%)  |
| Hygiene of roots and leafy vegetables               | Washing with water              | 22 (64.7%) | Don't eat vegetables           | 3 (8.8%)   | Washing waterm. vinegar and lemon | 2 (5.9%)  |
| Plantations at home                                 | Yes                             | 19 (55.9%) | No                             | 15 (44.1%) | -                                 | -         |
| Plantations types                                   | Fruits, vegetables and greens   | 15 (44.1%) | There is no plantation         | 15 (44.1%) | Only fruits                       | 4 (11.7%) |
| Purpose of this plantation                          | Consumption                     | 19 (55.9%) | There is no plantation         | 15 (44.1%) | -                                 | -         |
| Purpose of pig breeding                             | Consumption                     | 16 (47%)   | Consumption, exchange and sale | 7 (20.6%)  | Consumption and sale              | 6 (17.6%) |
| Frequency of pork consumption                       | Don't eat often                 | 7 (20.6%)  | Once a month                   | 6 (17.6%)  | Sometimes                         | 5 (14.7%) |
| Pork point                                          | Well done                       | 29 (85.3%) | Don't eat pork                 | 4 (11.7%)  | Poorly done                       | 1 (2.9%)  |
